# Supplementary material for: Predictive Power Estimation Algorithm (PPEA) - A New Algorithm to Reduce Overfitting for Genomic Biomarker Discovery
Source: PLoS One. 2011 Sep 15;6(9):e24233. doi: 10.1371/journal.pone.0024233 (PMC3174148; doi:10.1371/journal.pone.0024233)
Supplement: Table S1 — Summary of the positive class compounds and experiments which defined Bile Duct Hyperplasia, Inflammation, and Necrosis. (XLSX) [file pone.0024233.s002.xlsx]

## Sheet: Sheet1
Table S1: Summary of the positive class compounds and experiments which defined Bile Duct Hyperplasia, Inflammation, and Necrosis
Histopath. Group	Histopath. Name	#Treatment	# cmpd*	Name of Compounds
Biliary Injury	Bile Duct Hyperplasia	16	9	1-Naphthyl Isothiocyanate	Lomustine
				2-Acetylaminofluorene	Methapyrilene
				4,4'-Methylenedianiline	N-Nitrosodimethylamine
				Carmustine	Vinblastine
				Carvedilol
INFL	Periportal, Inflammatory Cell Infiltrate, Mixed Cell;	59	35	1-Naphthyl Isothiocyanate	Isoniazid
				2,3,7,8-Tetrachlorodibenzo-P-Dioxin	Ketoconazole
	Nonzonal, Inflammatory Cell Infiltrate, Mixed Cell;			3-Methylcholanthrene	Lipopolysaccharide E. Coli O55:B5
				4,4'-Methylenedianiline	Lomustine
	Centrilobular, Inflammatory Cell Infiltrate, Mixed Cell			Acetaminophen	Lorazepam
				Aflatoxin B1	Manganese (Ii) Chloride
				Alpha-Naphthoflavone	Methapyrilene
				Aminosalicylic Acid	N,N'-Diphenyl-P-Phenylenediamine
				Beta-Naphthoflavone	Naloxone
				Bromfenac	N-Nitrosodiethylamine
				Carbon Tetrachloride	N-Nitrosodimethylamine
				Carmustine	Norethindrone
				Carvedilol	Sertraline
				Cerivastatin	Streptozotocin
				Clofibric Acid	Testosterone
				Crotamiton	Thioacetamide
				Doxapram	Vecuronium Bromide
				Ethanol
Necrosis	Hepatocyte, Nonzonal, Necrosis, Apoptotic;	38	30	1-Naphthyl Isothiocyanate	Lorazepam
				2,3,7,8-Tetrachlorodibenzo-P-Dioxin	Lovastatin
	Hepatocyte, Centrilobular, Necrosis, Oncocytic;			Aflatoxin B1	Manganese (Ii) Chloride
				Allyl Alcohol	Methapyrilene
	Hepatocyte, Nonzonal, Necrosis, Oncocytic			Aminosalicylic Acid	Nateglinide
				Atorvastatin	N-Nitrosodiethylamine
				Bezafibrate	N-Nitrosodimethylamine
				Carbon Tetrachloride	Pirinixic Acid
				Clotrimazole	Pralidoxime Chloride
				Doxapram	Proglumide
				Epirubicin	Simvastatin
				Fenofibrate	Streptozotocin
				Fluvastatin	Thioacetamide
				Hydrocortisone	Vecuronium Bromide
				Indomethacin	Vinblastine
*cmpd - compound
